# Supplementary material for: CdSe/ZnS Quantum Rods (QRs) and Phenyl Boronic Acid BODIPY as Efficient Förster Resonance Energy Transfer (FRET) Donor–Acceptor Pair
Source: MDPI journal article supplement (doi:10.3390/nano14090794), 2024-05-03
Supplement: s1 [file s1]

### Example of numeration

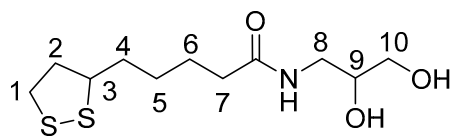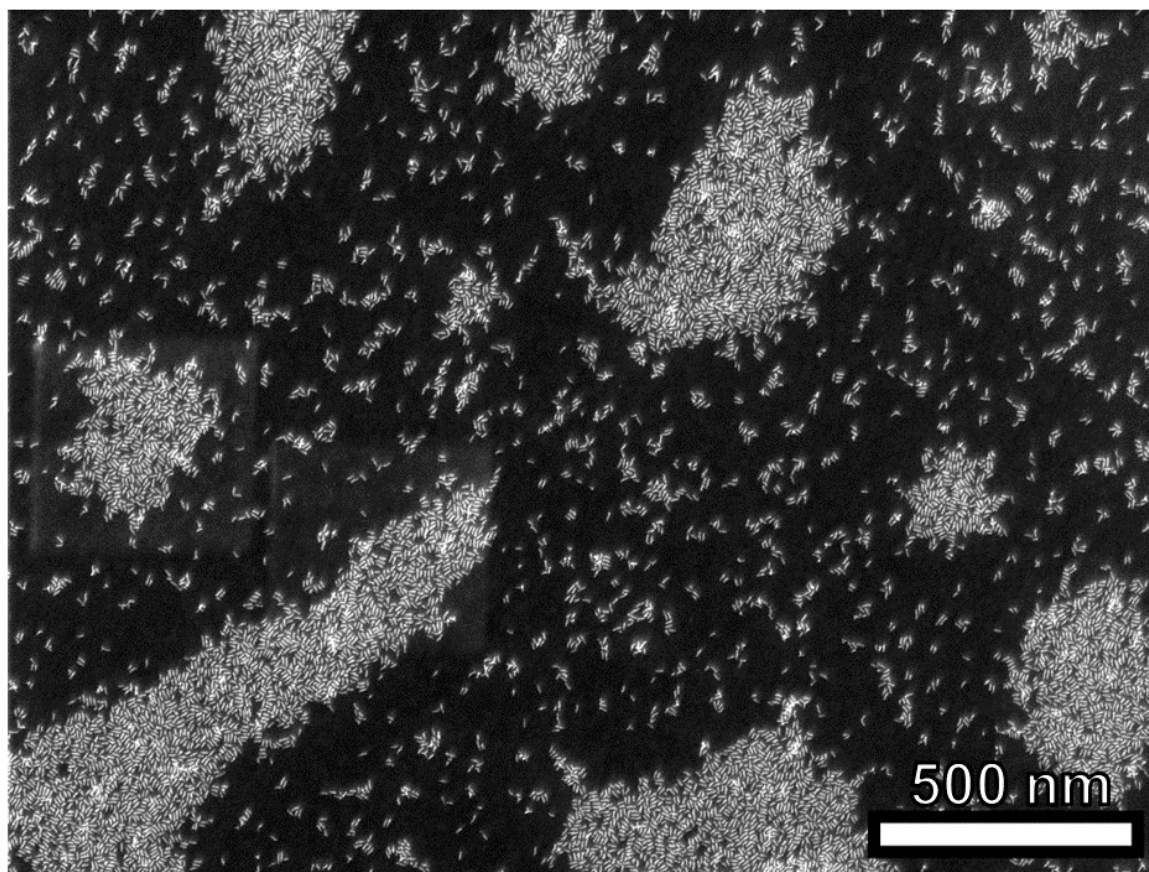

**Figure S1.** Representative STEM micrograph overview at low mag of CdSe/ZnS QRs 7.

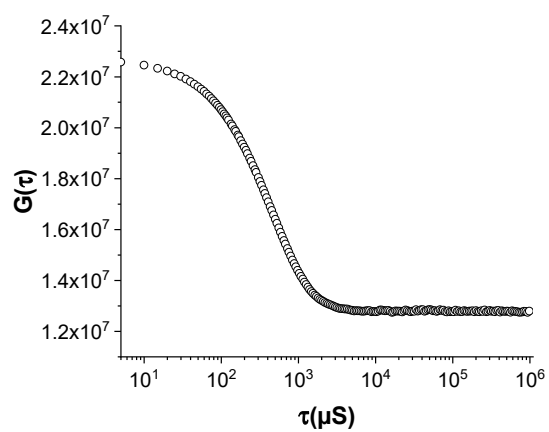

**Figure S2.** Raw autocorrelation Function for the DLS analysis of QRs 1.

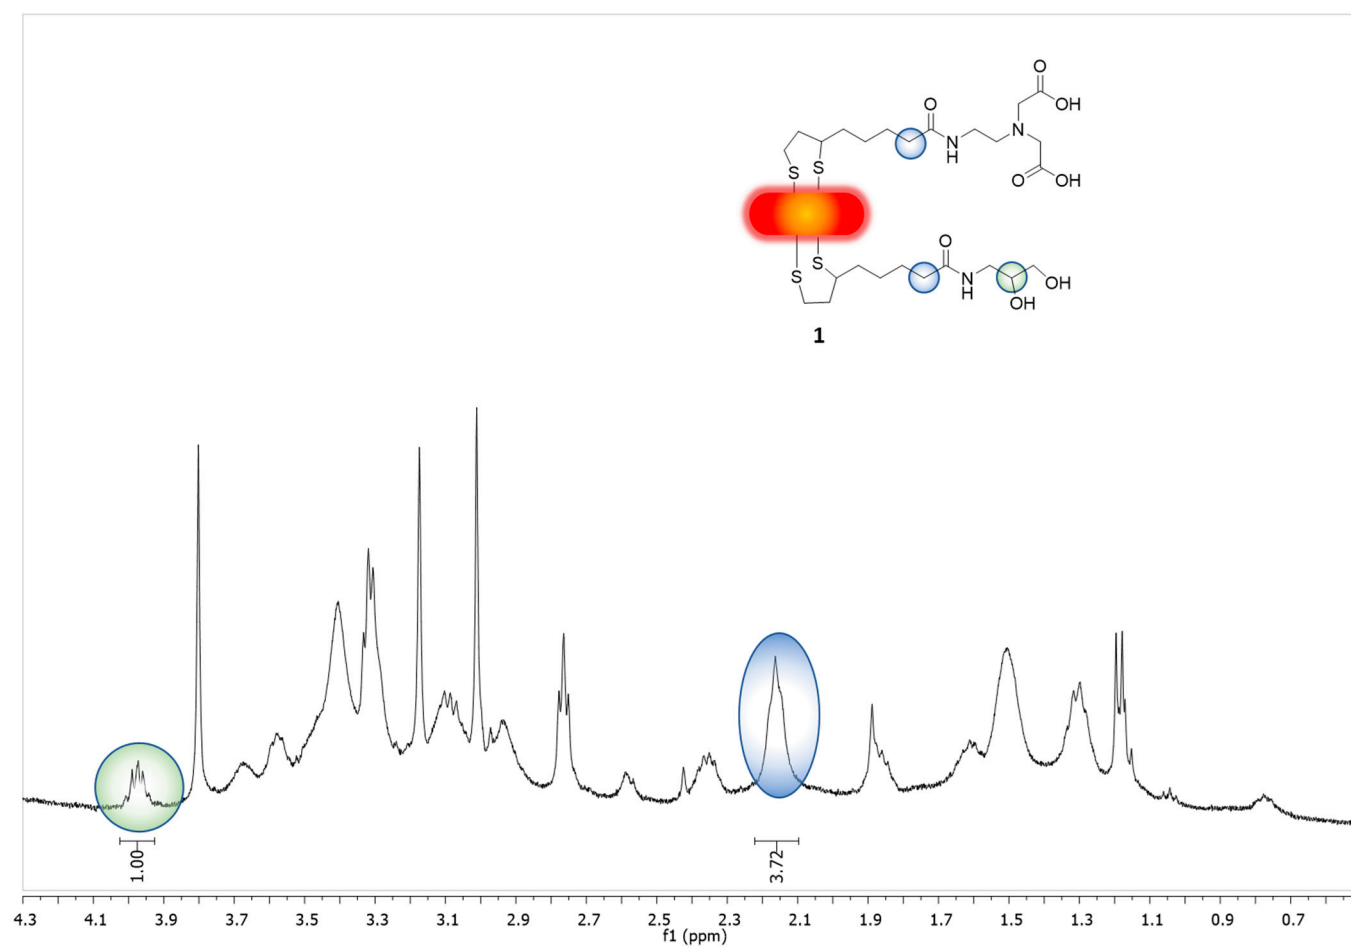

**Figure S3.**  $^1\text{H-NMR}$  (400 MHz) of a dispersion of QRs **1** in  $\text{D}_2\text{O}$ .

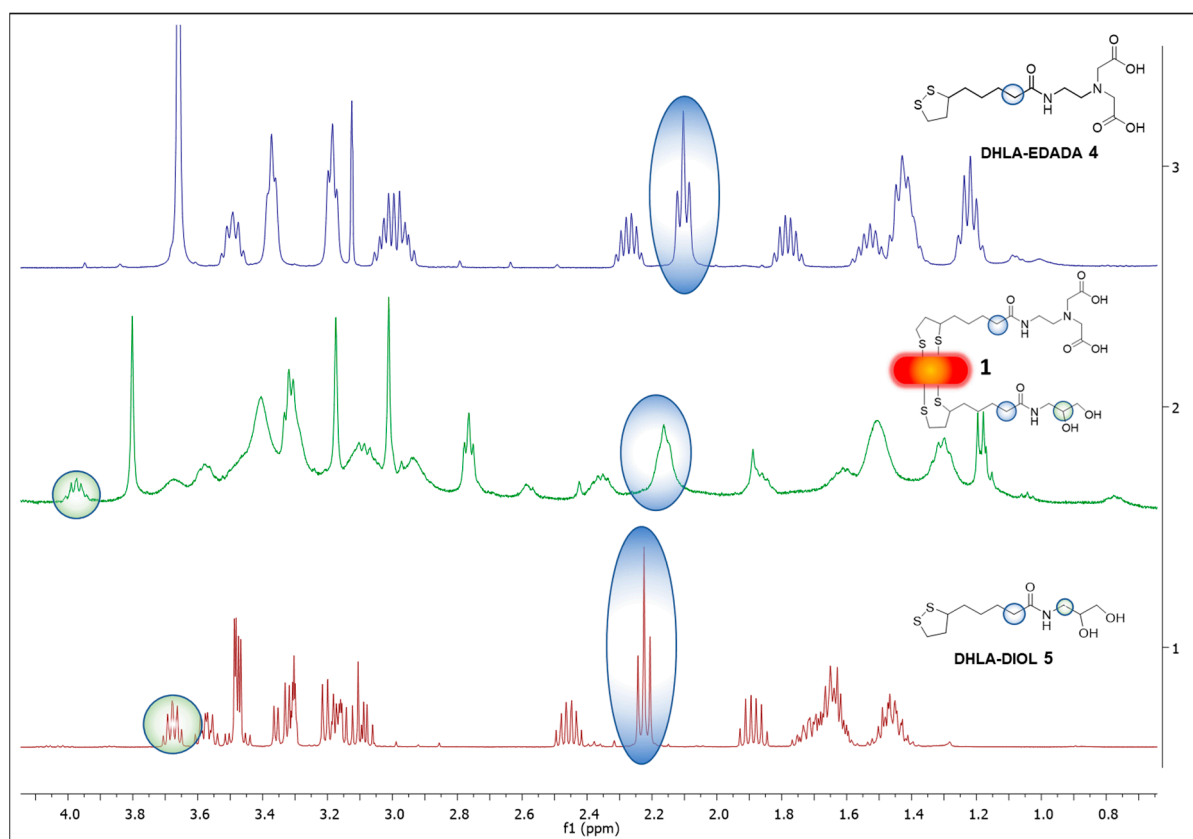

**Figure S4.**  $^1\text{H}$ -NMR spectra comparison: in blue  $^1\text{H}$ -NMR 400 MHz of DHLA-EDADA **4** in  $\text{D}_2\text{O}$ ; in green  $^1\text{H}$ -NMR 400 MHz of QRs **1** in  $\text{D}_2\text{O}$  and in red  $^1\text{H}$ -NMR 400 MHz of DHLA-DIOL **5** in  $\text{CD}_3\text{OD}$ .

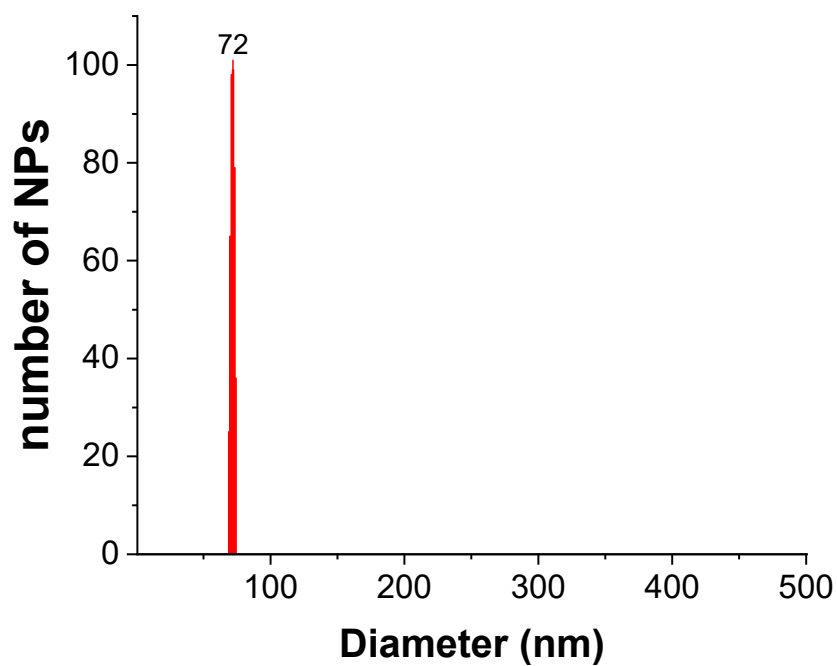

**Figure S5.** Size distribution measured by dynamic light scattering of a dispersion of QRs **3** in water.

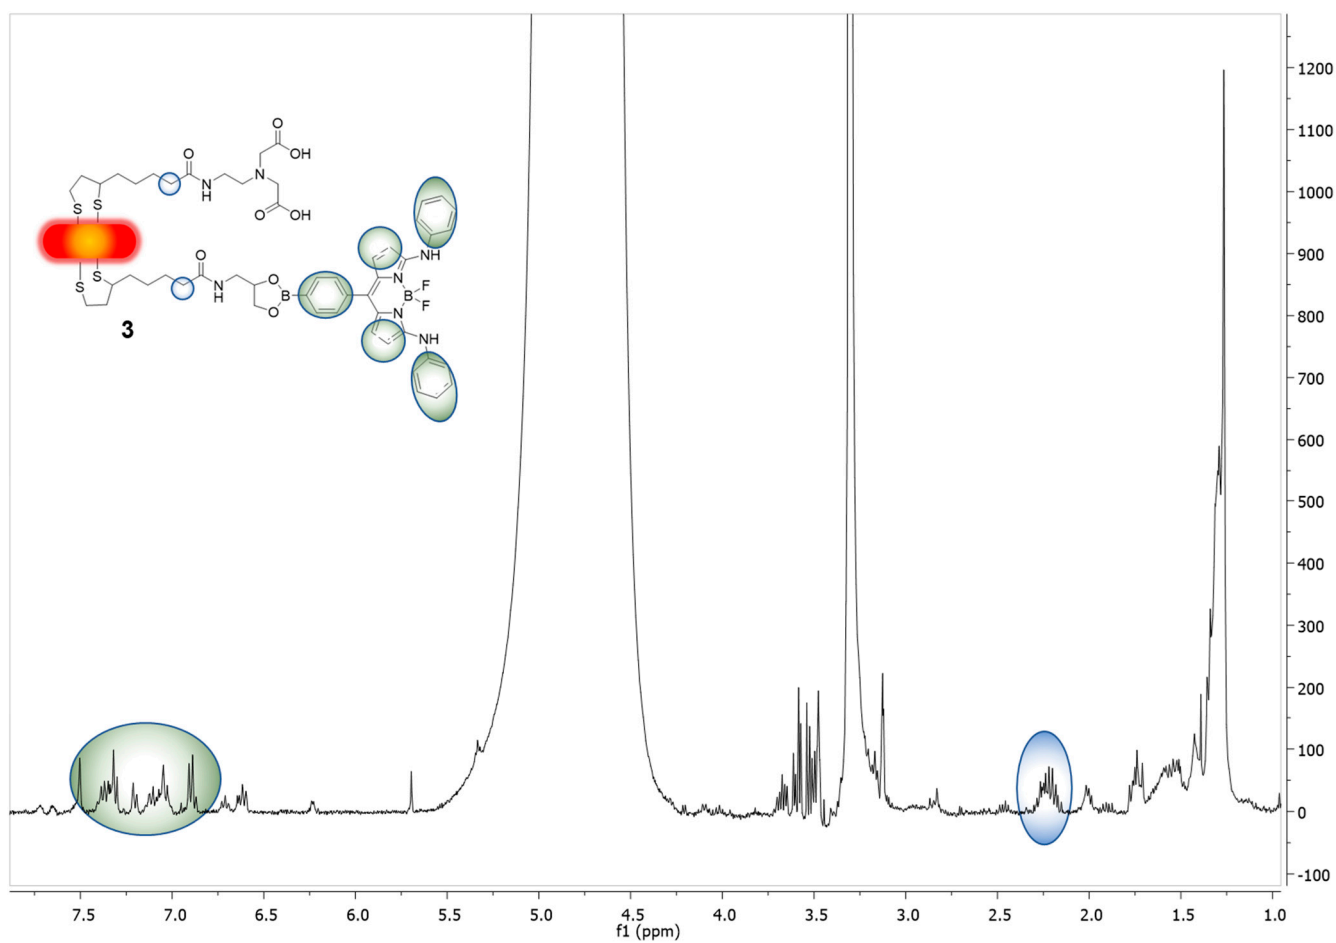

**Figure S6.**  $^1\text{H}$ -NMR (400 MHz) of a dispersion of QRs **3** in  $\text{CD}_3\text{OD}$ .

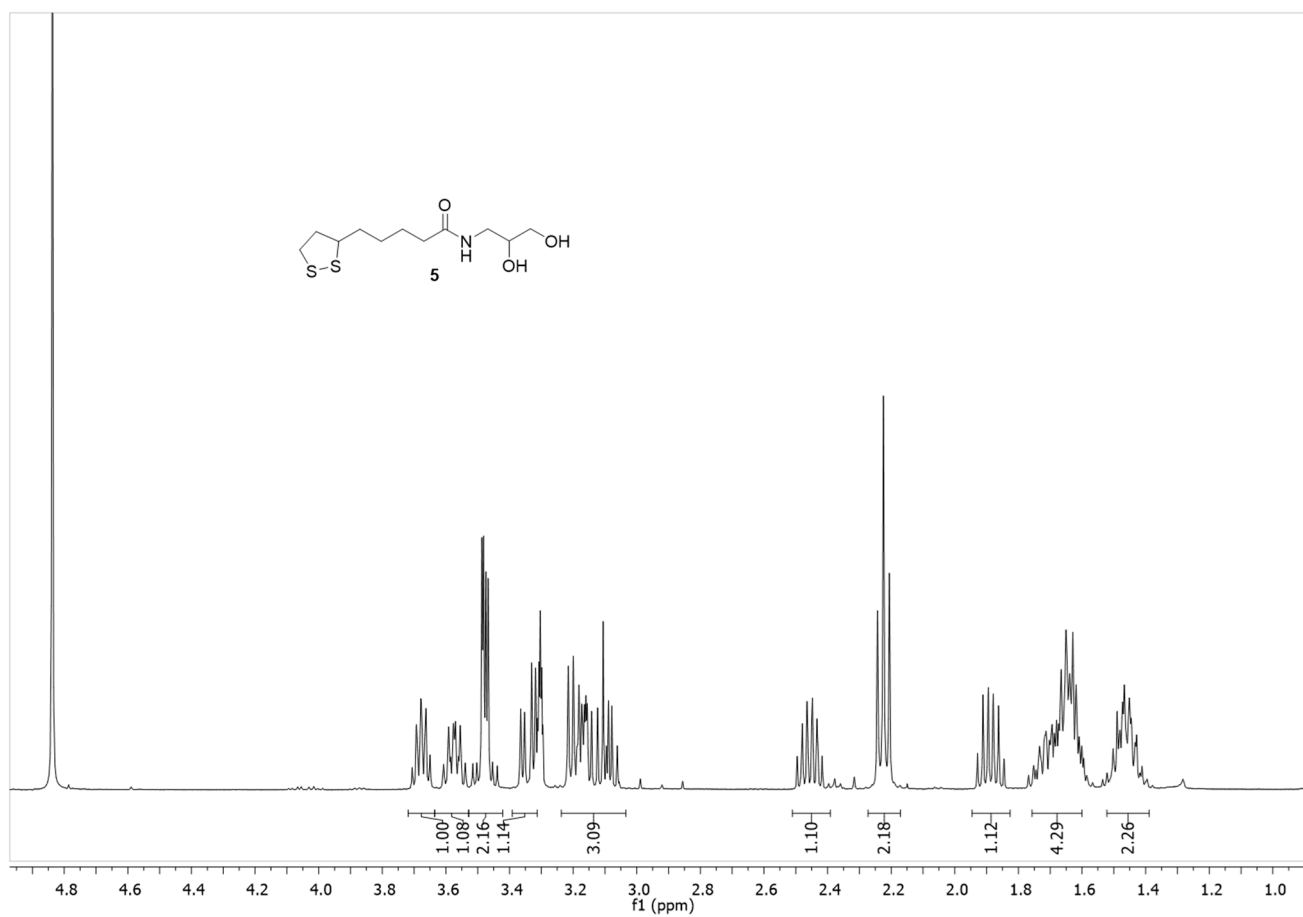

**Figure S7.** <sup>1</sup>H-NMR (400 MHz) of the DHLA-Diol 5 in CD<sub>3</sub>OD.

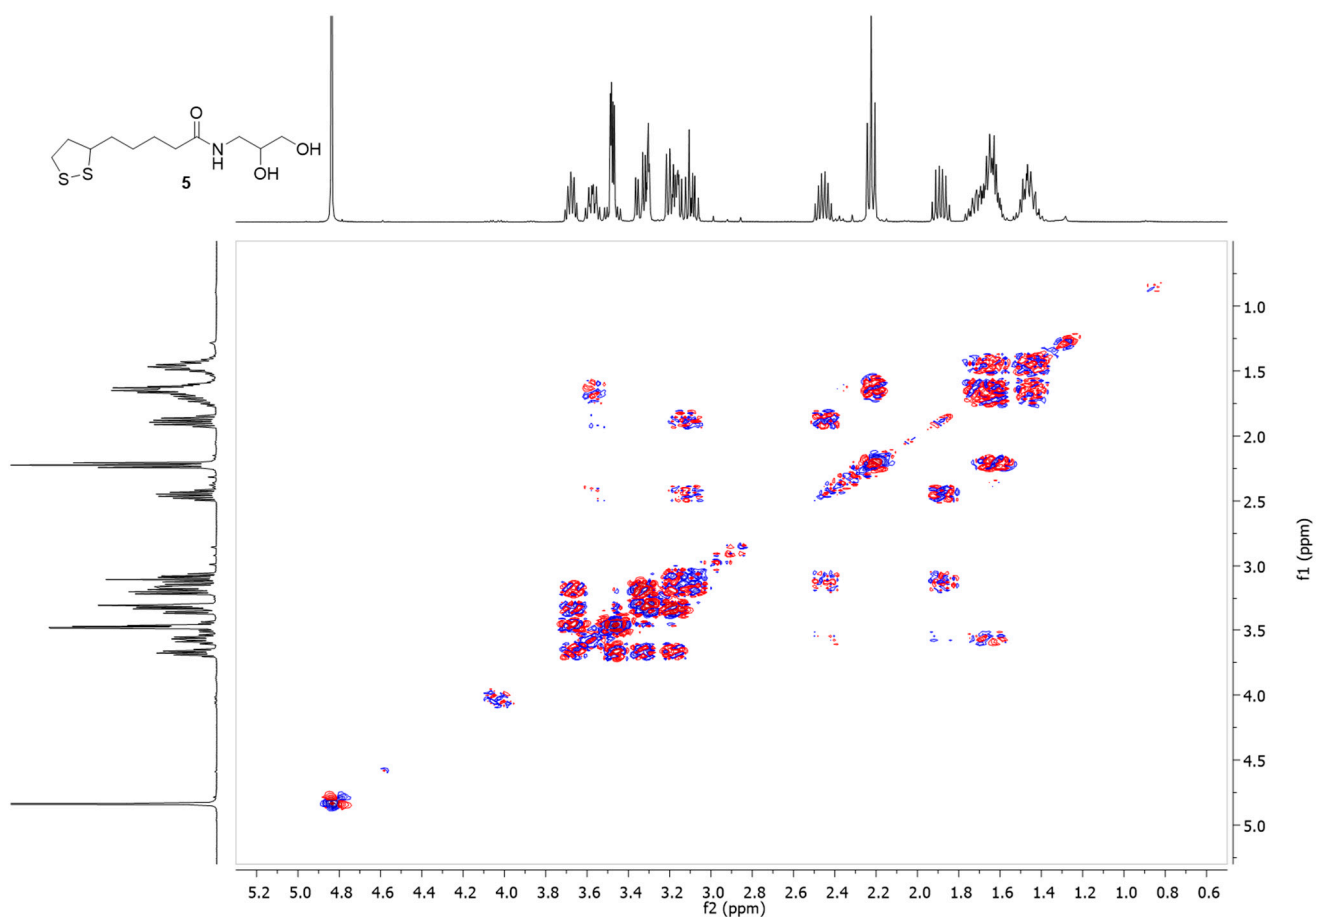

**Figure S8.** gCOSY NMR (400 MHz) of the DHLA-Diol **5** in CD<sub>3</sub>OD.

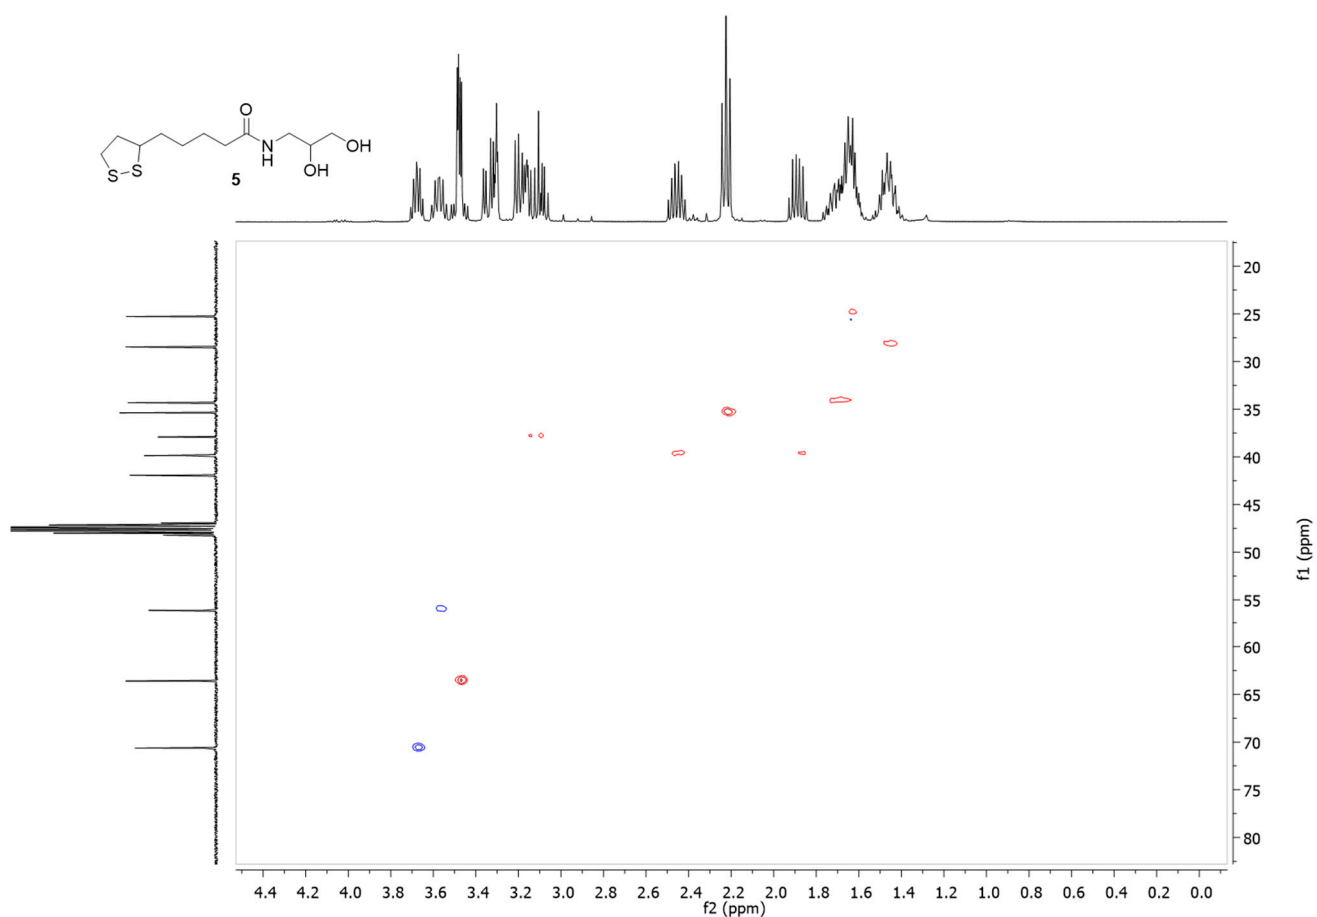

**Figure S9.** gHSQC NMR (400 MHz) of the DHLA-Diol **5** in CD<sub>3</sub>OD.

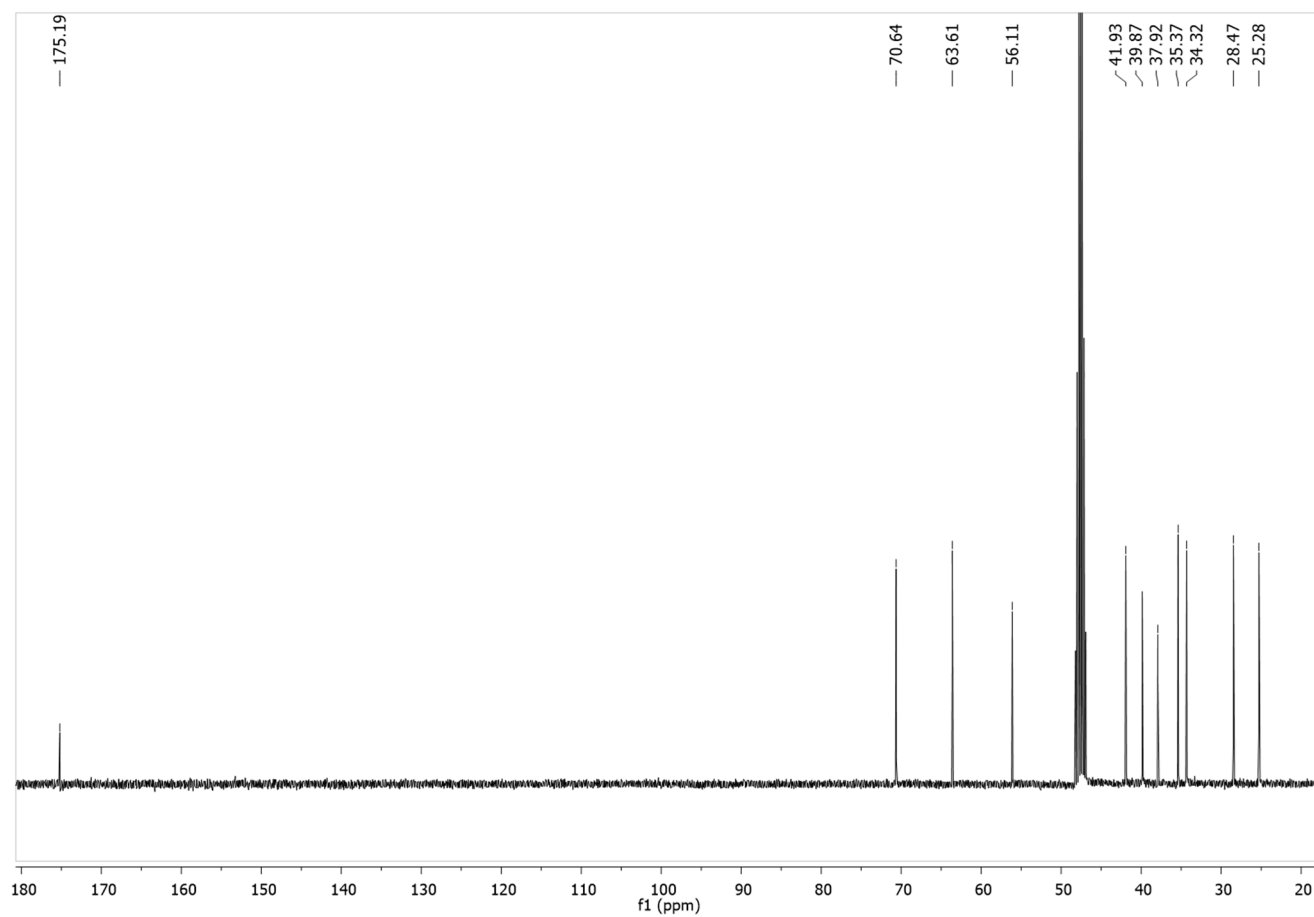

**Figure S10.**  $^{13}\text{C}$ -NMR (100 MHz) of the DHLA-Diol 5 in  $\text{CD}_3\text{OD}$ .
